# Supplementary material
Source: publisher figshare collection journal article supplement (https://acs.figshare.com/ndownloader/files/9153805)
Supplement: Supplementary file 1 [file 9153805]

## Supporting Information

# Effects of Pectin Molecular-Weight Changes on the Structure, Dynamics, and Polysaccharide Interactions of Primary Cell Walls of *Arabidopsis* *thaliana*: Insights from Solid-State NMR

Pyae Phy<sup>1</sup>, Tuo Wang<sup>1\$\*</sup>, Chaowen Xiao<sup>2\$#</sup>, Charles T. Anderson<sup>2\*</sup> and Mei Hong<sup>1\*</sup>

<sup>1</sup> Department of Chemistry, Massachusetts Institute of Technology, 170 Albany Street,  
Cambridge, MA 02139

<sup>2</sup> Department of Biology, Pennsylvania State University, University Park, PA 16802

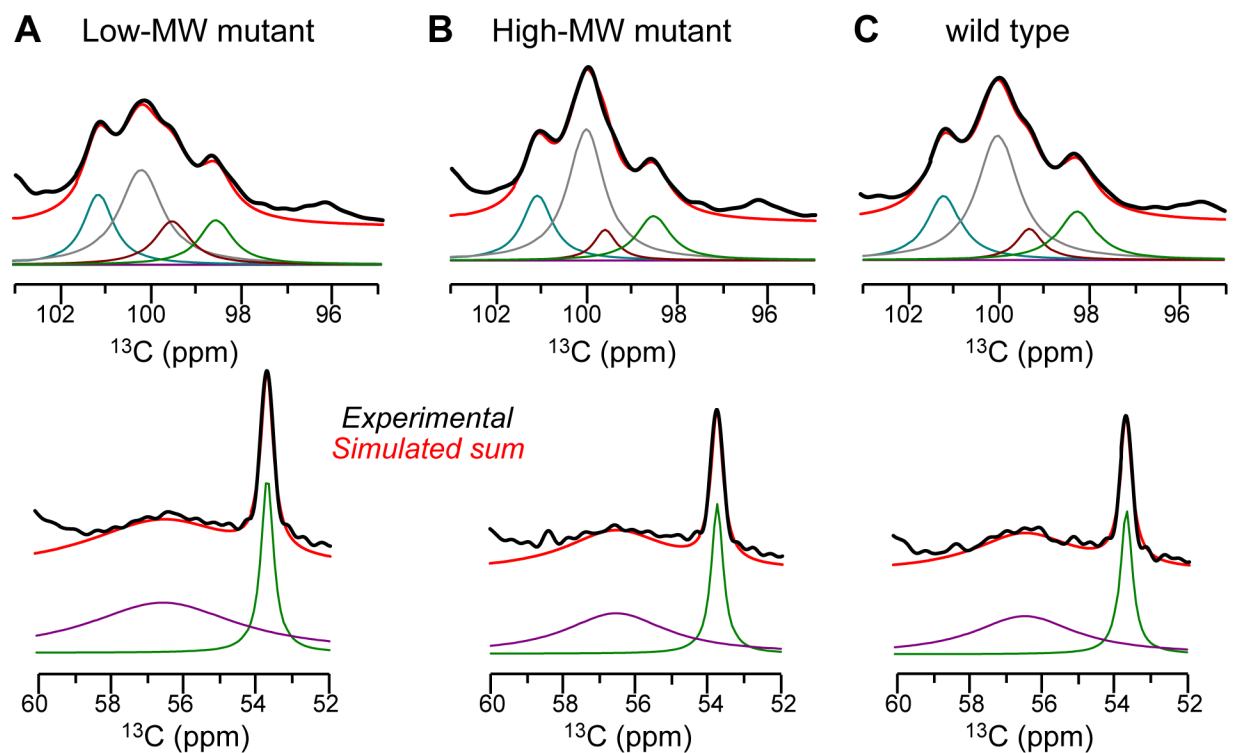

**Figure S1.** Deconvolution of the 101-ppm peak (top row) and the 54-ppm peak (bottom row) in the quantitative  $^{13}\text{C}$  spectra of (A) low-MW mutant, (B) high-MW mutant, and (C) wild-type cell walls. The simulated sum is shown in red.

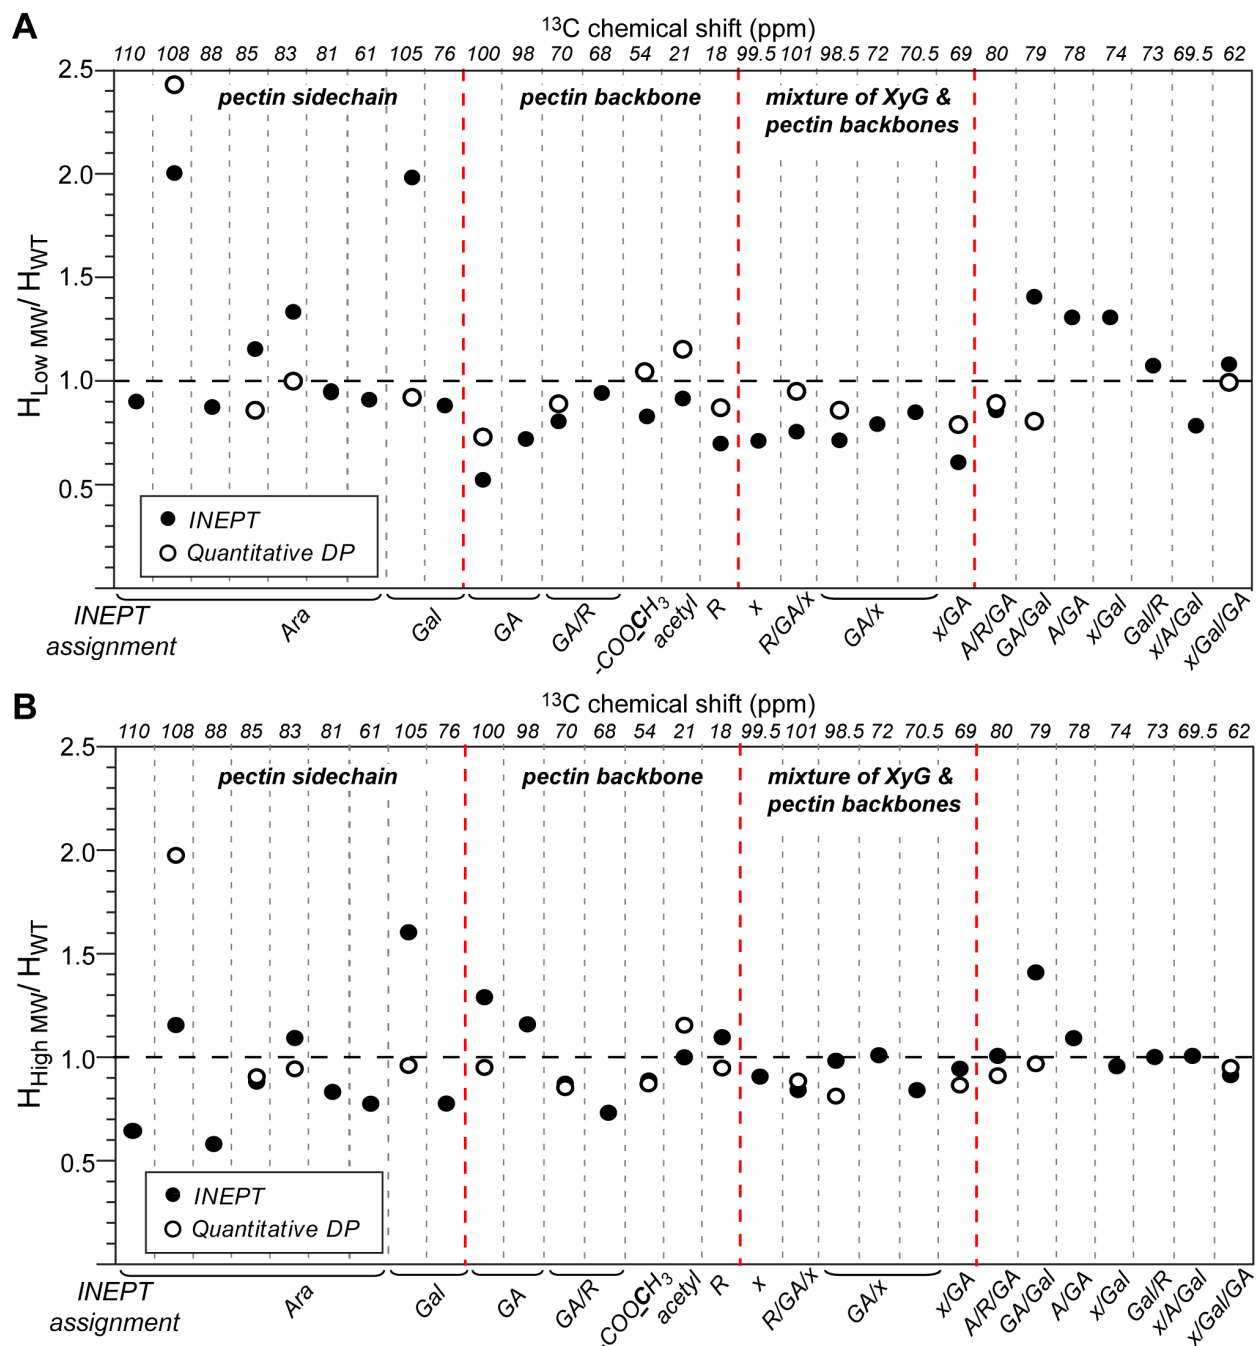

**Figure S2.** Quantitative and INEPT intensity ratios (A) between low-MW and wild-type cell walls and (B) between high-MW and wild-type cell walls. Peak heights of the low-MW spectrum are scaled by 0.67 and the high-MW spectrum are scaled by 1.05 to account for sample amount differences.
